# Supplementary material for: Efficient synthesis and excellent antimicrobial activity of star-shaped cationic polypeptides with improved biocompatibility
Source: Royal Society of Chemistry journal article supplement (doi:10.1039/d0bm02151b), 2021-01-01
Supplement: d0bm02151b1.pdf [file d0bm02151b1.pdf]

Supporting Information

**Efficient Synthesis and Excellent Antimicrobial Activity of Star-Shaped  
Cationic Polypeptides with Improved Biocompatibility**

Hao Liu,<sup>a</sup> Xu Zhang,<sup>b</sup> Ziyin Zhao,<sup>a</sup> Fangping Yang,<sup>a</sup> Ruizhong Xue,<sup>a</sup> Lichen Yin,<sup>a</sup>

Ziyuan Song,<sup>a</sup> Jianjun Cheng,<sup>c</sup> Shifang Luan,<sup>b,\*</sup> Haoyu Tang,<sup>a,\*</sup>

<sup>a</sup> *Institute of Functional Nano & Soft Materials (FUNSOM), Collaborative Innovation  
Center of Suzhou Nano Science & Technology, Soochow University, Suzhou 215123,  
China*

<sup>b</sup> *State Key Laboratory of Polymer Physics and Chemistry, Changchun Institute of  
Applied Chemistry, Chinese Academy of Sciences, Changchun, 130022, China*

<sup>c</sup> *Department of Materials Science and Engineering, University of Illinois at  
Urbana–Champaign, Urbana, Illinois 61801, United States*

Correspondence to: Haoyu Tang (Email: [hytang@suda.edu.cn](mailto:hytang@suda.edu.cn)) or Shifang  
Luan ([sfluan@ciac.ac.cn](mailto:sfluan@ciac.ac.cn))

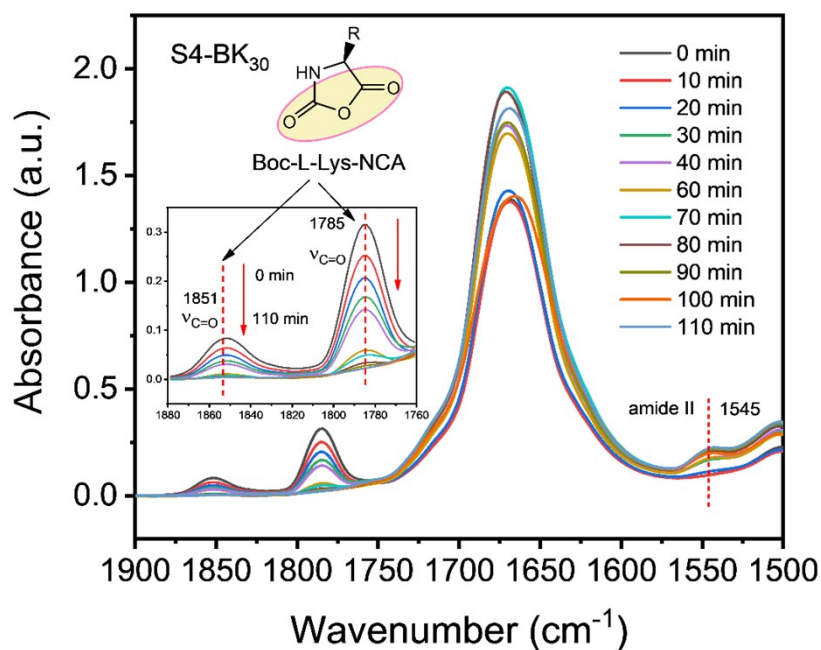

**Figure S1.** Polymerization process of Boc-L-Lys-NCA initiated by G0-PAMAM in a mixed solvent of DCM and DMF (v/v = 2.5) as measured by FTIR. Polymerization condition:  $[M]_0 = 0.4$  M.

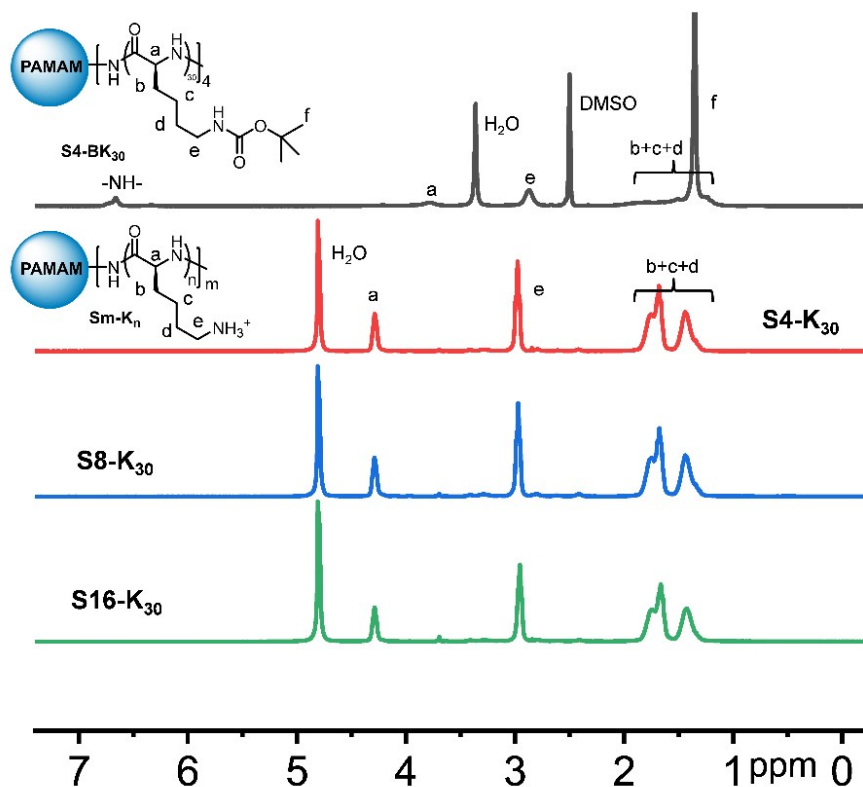

**Figure S2.**  $^1\text{H}$  NMR spectra of S4-BK<sub>30</sub> in DMSO- $d_6$  and S<sub>m</sub>-K<sub>n</sub> ( $m = 4, 8, 16, n = 30$ ) in D<sub>2</sub>O.

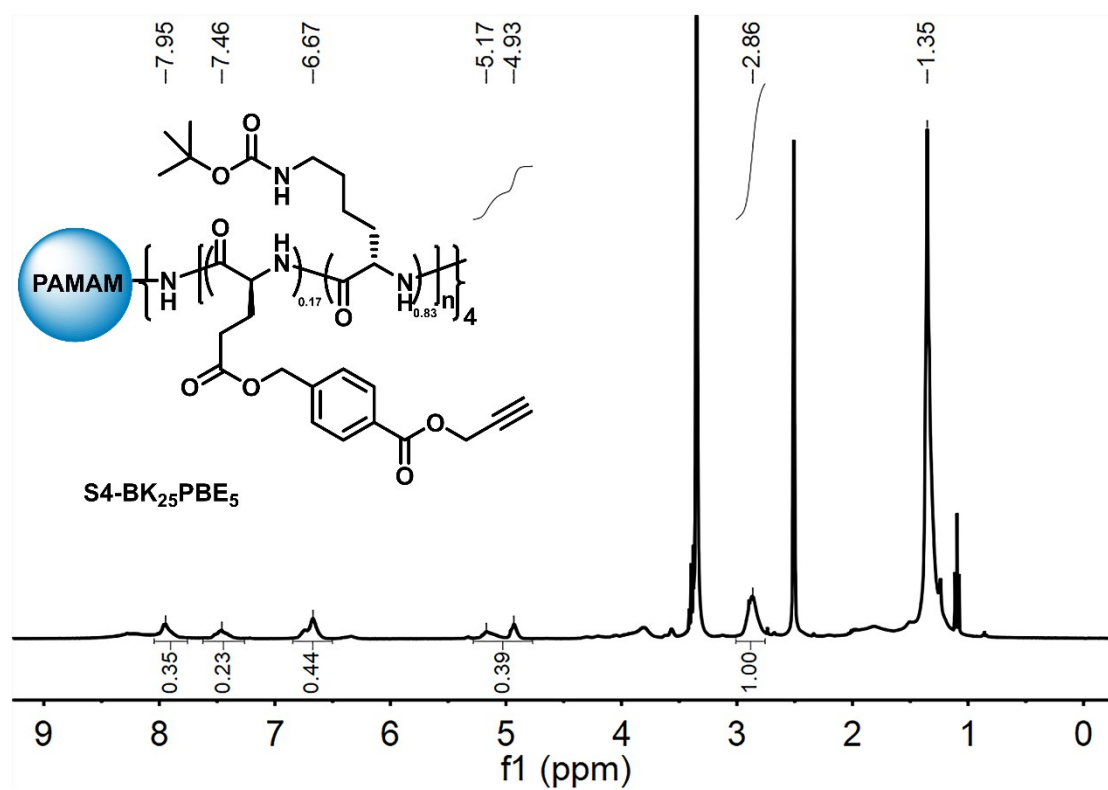

**Figure S3.** <sup>1</sup>H NMR spectrum of S4-BK<sub>25</sub>PBE<sub>5</sub> in DMSO-d<sub>6</sub>.

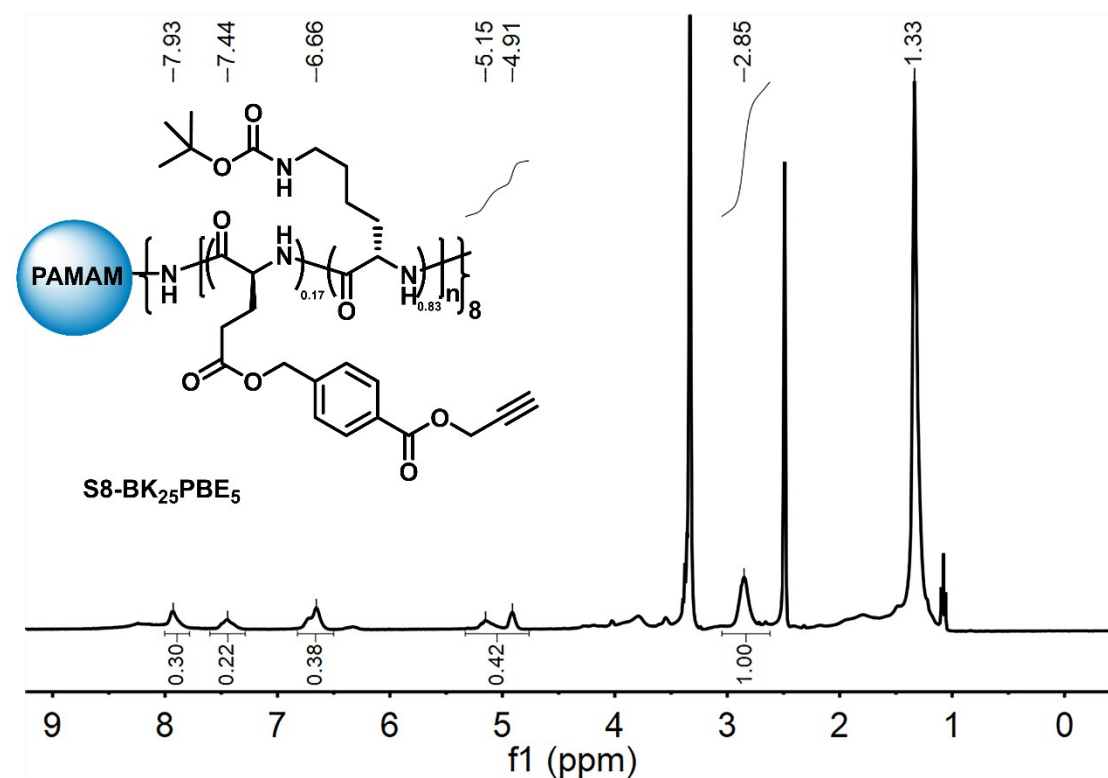

**Figure S4.** <sup>1</sup>H NMR spectrum of S8-BK<sub>25</sub>PBE<sub>5</sub> in DMSO-d<sub>6</sub>.

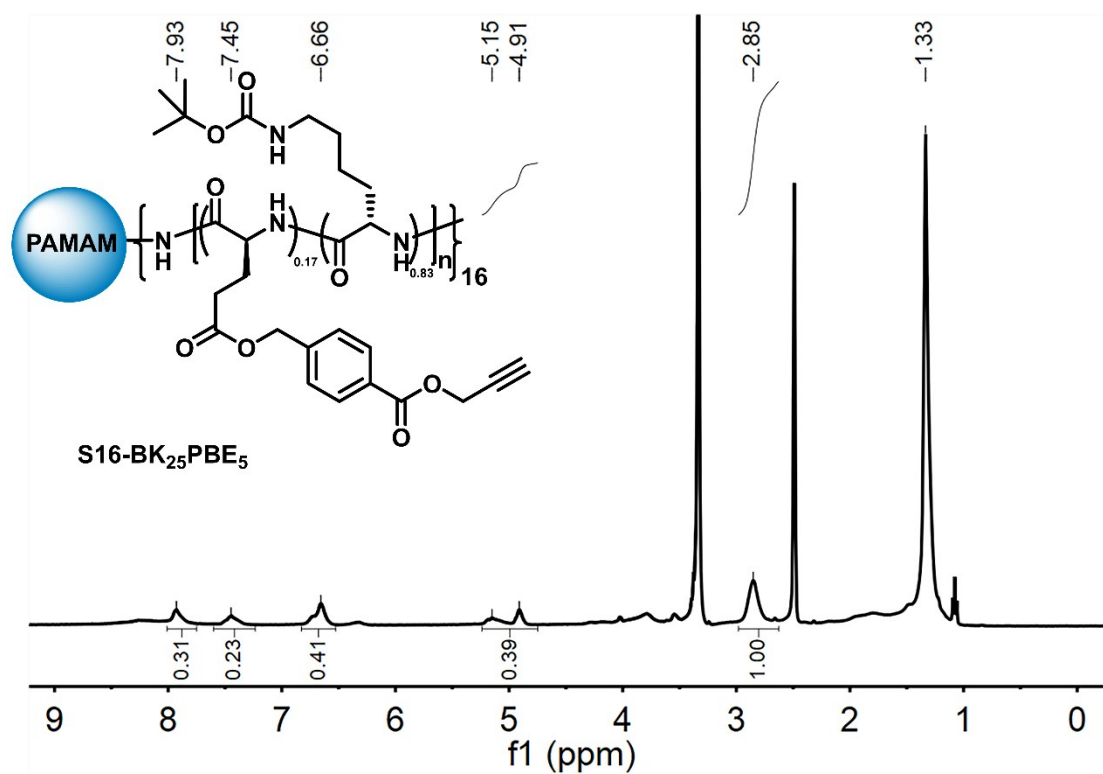

**Figure S5.** <sup>1</sup>H NMR spectrum of S16-BK<sub>25</sub>PBE<sub>5</sub> in DMSO-d<sub>6</sub>.

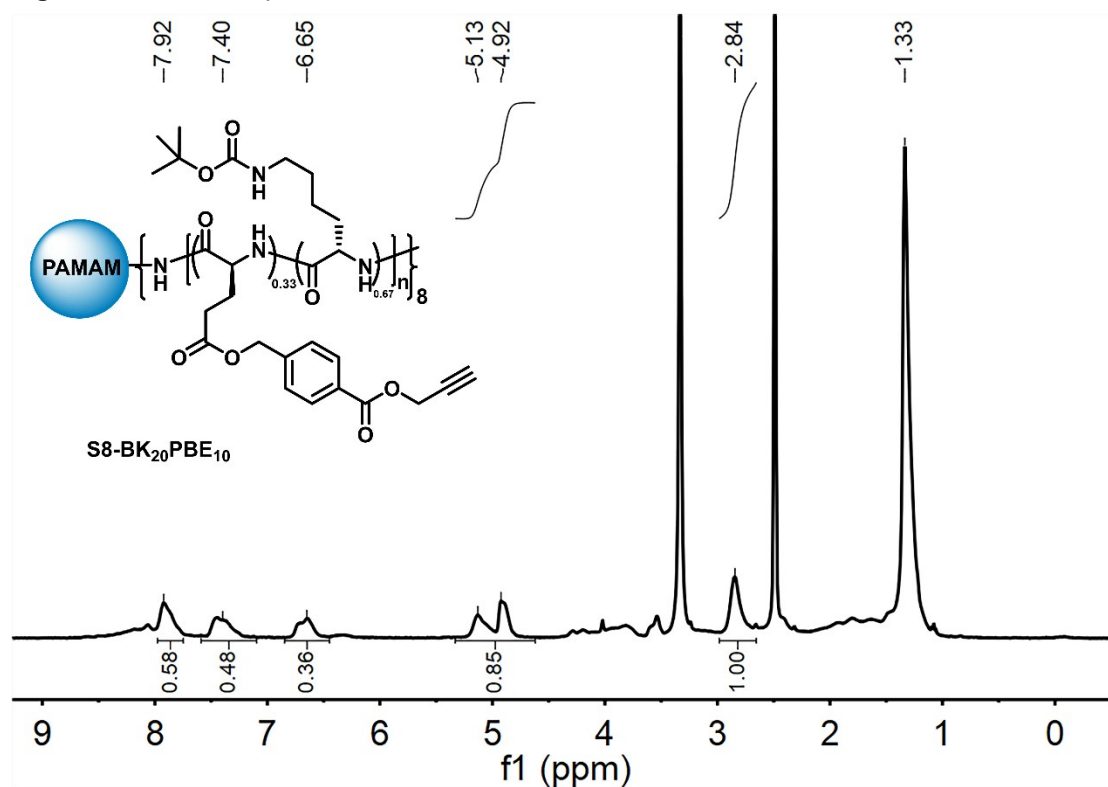

**Figure S6.** <sup>1</sup>H NMR spectrum of S8-BK<sub>20</sub>PBE<sub>10</sub> in DMSO-d<sub>6</sub>.

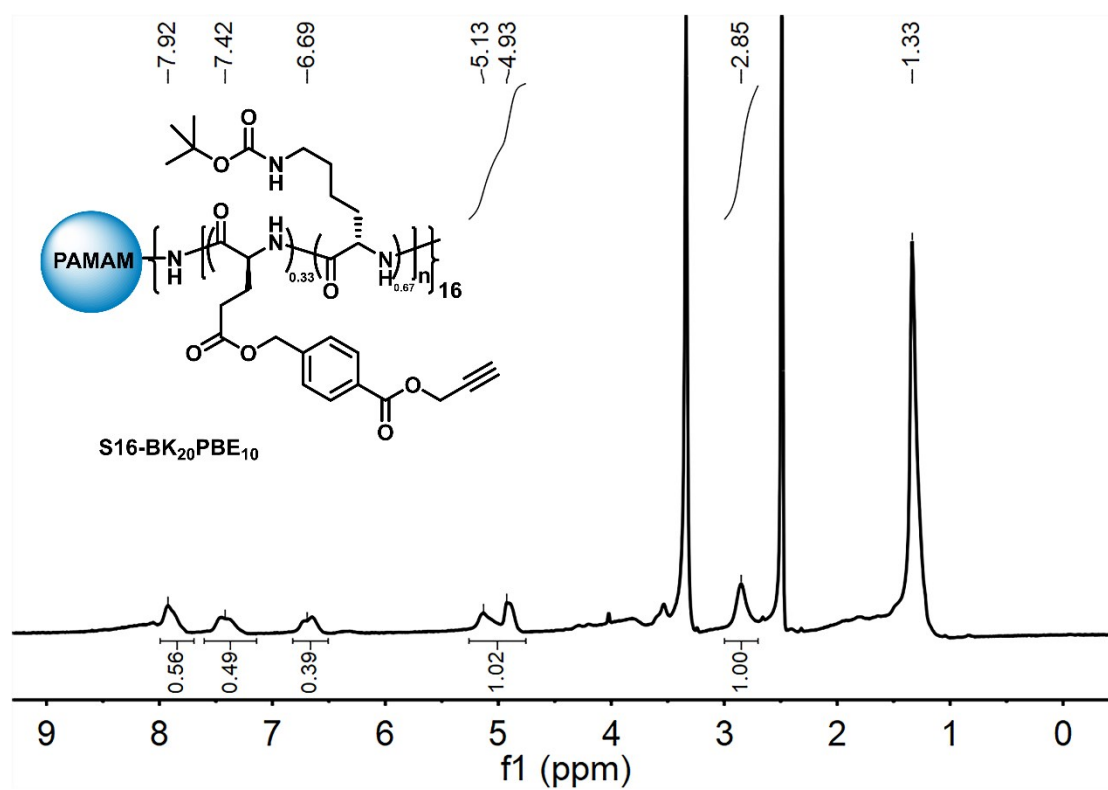

**Figure S7.** <sup>1</sup>H NMR spectrum of S16-BK<sub>20</sub>PBE<sub>10</sub> in DMSO-d<sub>6</sub>.

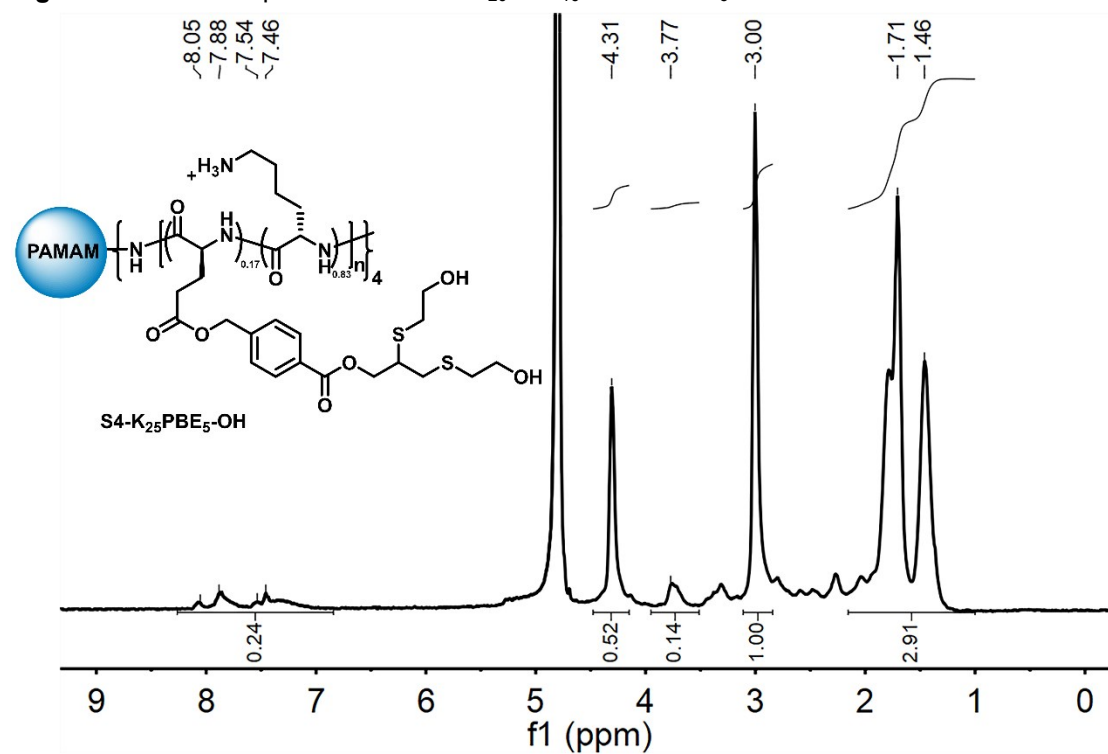

**Figure S8.** <sup>1</sup>H NMR spectrum of S4-K<sub>25</sub>PBE<sub>5</sub>-OH in D<sub>2</sub>O.

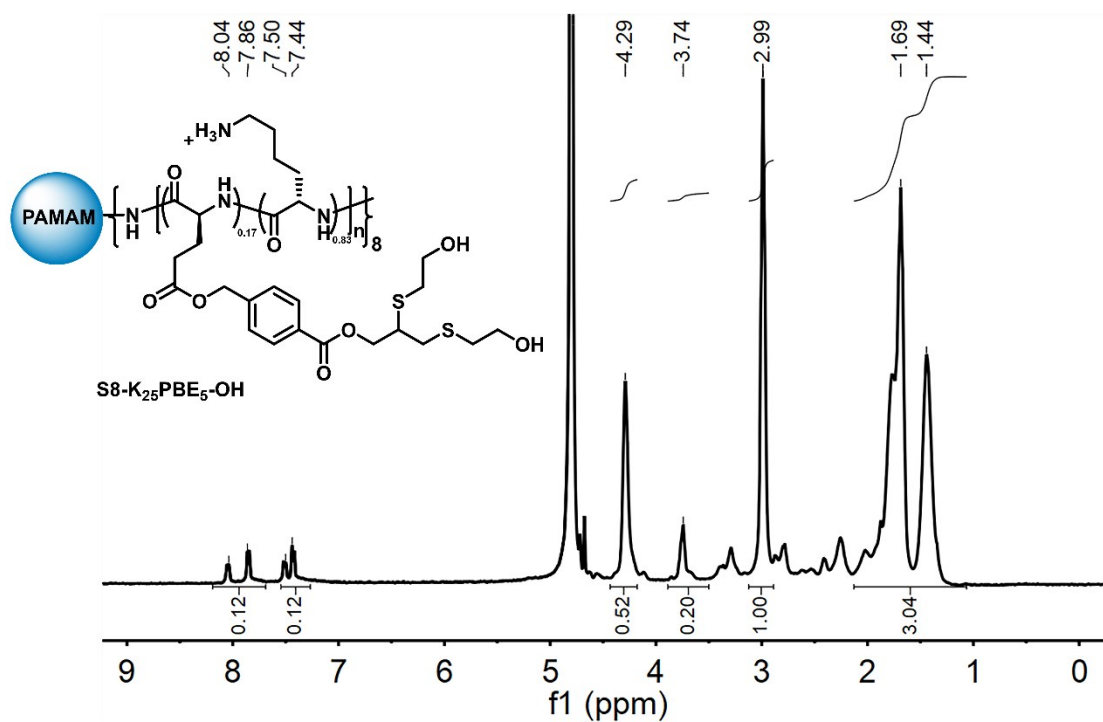

**Figure S9.** <sup>1</sup>H NMR spectrum of S8-K<sub>25</sub>PBE<sub>5</sub>-OH in D<sub>2</sub>O.

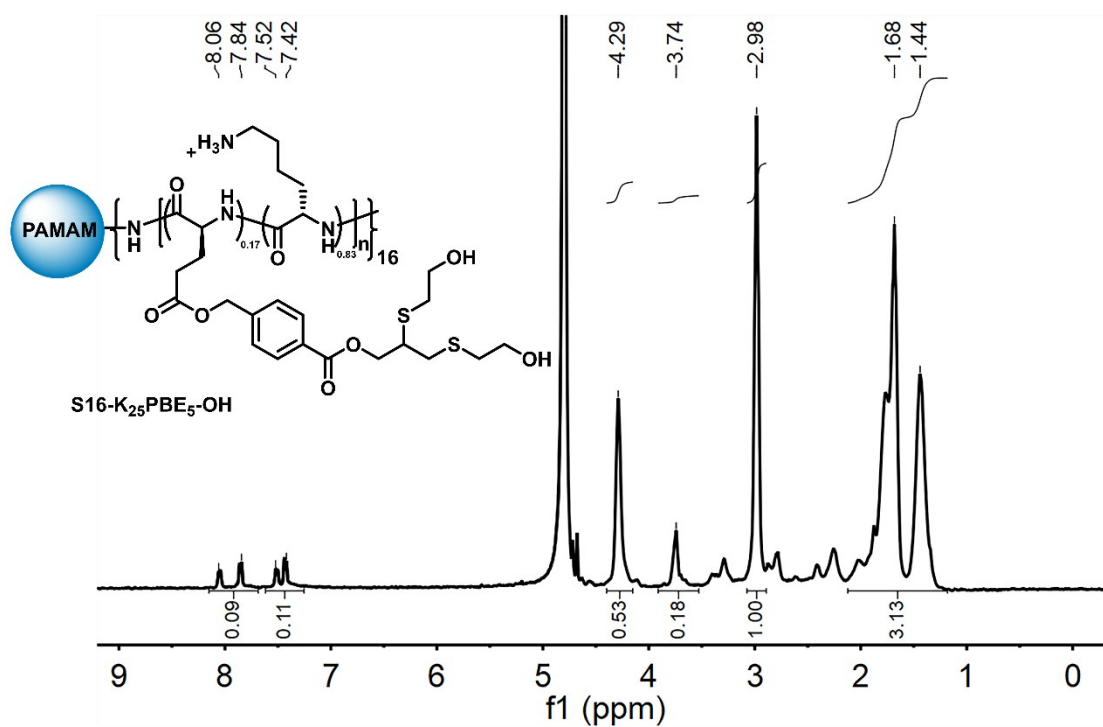

**Figure S10.** <sup>1</sup>H NMR spectrum of S16-K<sub>25</sub>PBE<sub>5</sub>-OH in D<sub>2</sub>O.

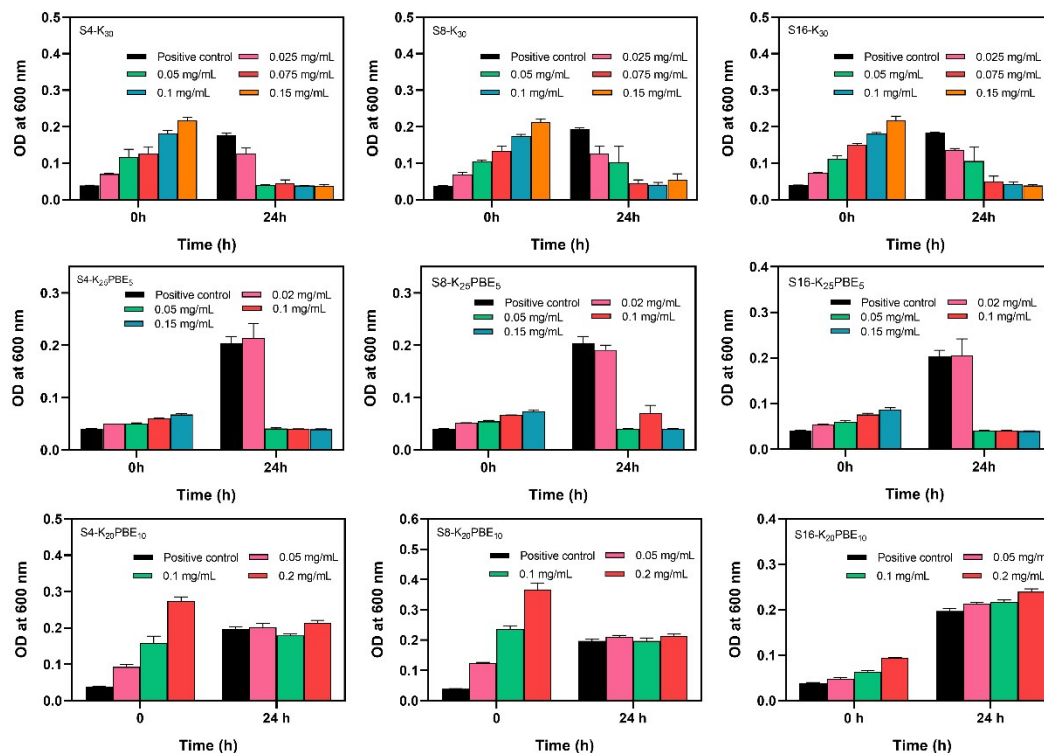

**Figure S11.** Dose-dependent growth inhibition of *S. aureus* in the presence of the resulting polymers.

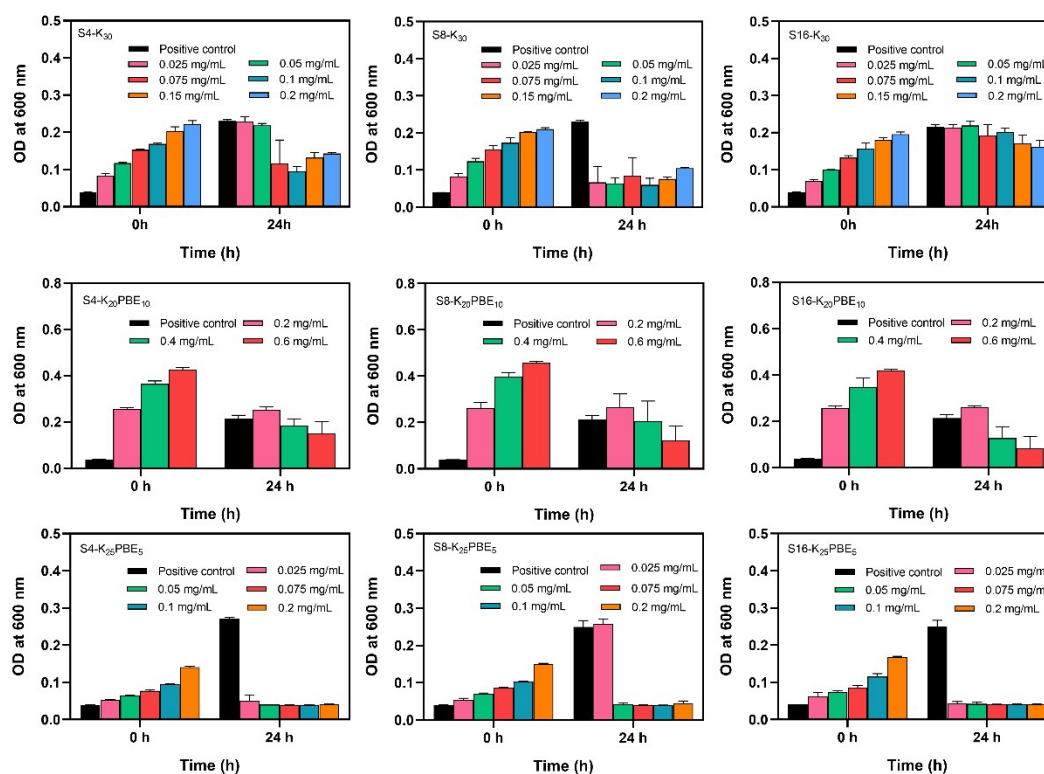

**Figure S12.** Dose-dependent growth inhibition of *E. coli* in the presence of the resulting polymers.



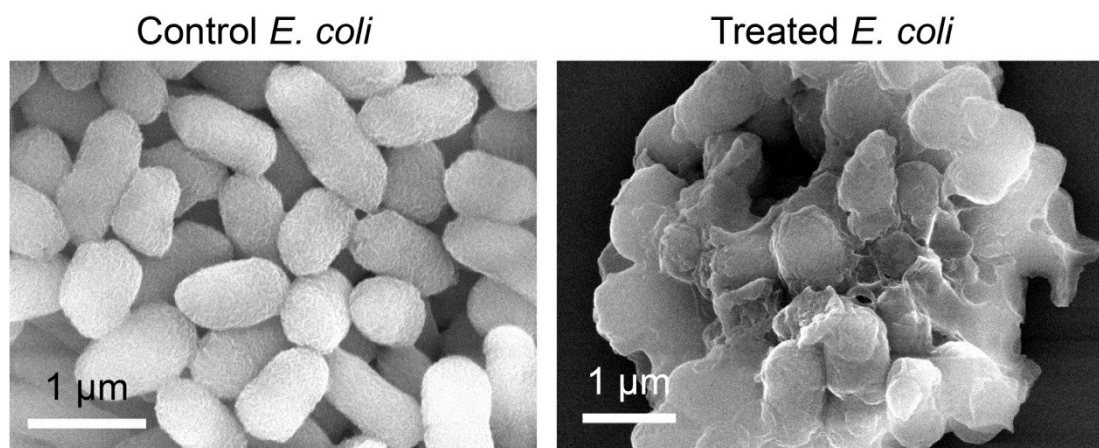

**Figure S13.** SEM micrographs un- and S4-K<sub>25</sub>PBE<sub>5</sub>-OH treated *E. coli* at 4 × MIC for 3 h.

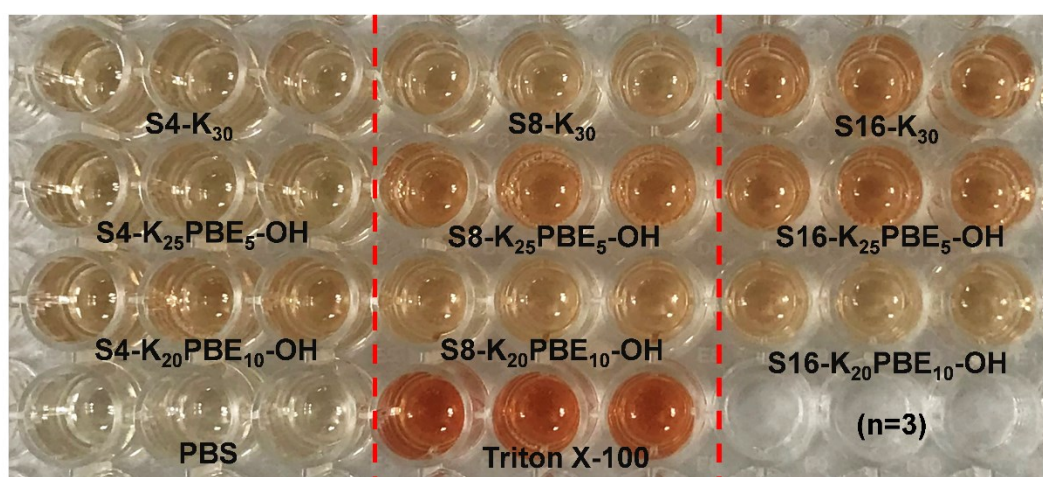

**Figure S14.** Optical images of the supernatant of mice red blood cells after hemolysis experiment (4 mg·mL<sup>-1</sup>).

**Table S1.** The Gx-PAMAM mediated ROP of Boc-L-Lys-NCA

| Entry | Sample               | Initiator | [M] <sub>0</sub> /[NH <sub>2</sub> ] <sub>0</sub> | <i>M<sub>n</sub></i> (thero) | <i>M<sub>n</sub></i> (GPC) | <i>M<sub>w</sub></i> / <i>M<sub>n</sub></i> |
|-------|----------------------|-----------|---------------------------------------------------|------------------------------|----------------------------|---------------------------------------------|
| 1     | S4-BK <sub>30</sub>  | G0-PAMAM  | 30                                                | 27900                        | 28000                      | 1.15                                        |
| 2     | S8-BK <sub>30</sub>  | G1-PAMAM  | 30                                                | 56200                        | 50200                      | 1.07                                        |
| 3     | S16-BK <sub>30</sub> | G2-PAMAM  | 30                                                | 112700                       | 114500                     | 1.05                                        |
| 4     | S4-BK <sub>60</sub>  | G0-PAMAM  | 60                                                | 55200                        | 54700                      | 1.03                                        |
| 5     | S8-BK <sub>60</sub>  | G1-PAMAM  | 60                                                | 110900                       | 105200                     | 1.01                                        |
| 6     | S16-BK <sub>60</sub> | G2-PAMAM  | 60                                                | 222100                       | N/A <sup>a</sup>           | N/A                                         |
| 7     | S4-BK <sub>100</sub> | G0-PAMAM  | 100                                               | 91700                        | 91500                      | 1.15                                        |
| 8     | S4-BK <sub>200</sub> | G0-PAMAM  | 200                                               | 182900                       | N/A                        | N/A                                         |
| 9     | S8-BK <sub>200</sub> | G1-PAMAM  | 200                                               | 366200                       | N/A                        | N/A                                         |
| 10    | S8-BK <sub>400</sub> | G1-PAMAM  | 400                                               | 731000                       | N/A                        | N/A                                         |

<sup>a</sup> The data were not available owing to the bimodal peaks of the GPC curves.
